# Supplementary material for: Probing intracellular oxygen by quenched phosphorescence lifetimes of nanoparticles containing polyacrylamide-embedded [Ru(dpp(SO3Na)2)3]Cl2
Source: Royal Society of Chemistry journal article supplement (doi:10.1039/b9pp00071b), 2009-12-07

# Probing Intracellular Oxygen by Quenched Phosphorescence Lifetimes of Nanoparticles containing polyacrylamide-embedded $\text{Ru}([\text{dpp}(\text{SO}_3\text{Na})_2]_3)\text{Cl}_2$

Michael P. Coogan<sup>a</sup>, Jonathan B. Court<sup>b</sup>, Victoria L. Gray<sup>b</sup>,  
Anthony J. Hayes<sup>c</sup>, Siôn H. Lloyd<sup>b</sup>, Coralie O. Millet<sup>b</sup>, Simon J.A. Pope<sup>a</sup>, and David Lloyd<sup>b\*</sup>

<sup>a</sup> Department of Chemistry, Cardiff University, Cardiff, Wales UK  
CF10 3AT

Fax: +44(0)02920 874030 Tel: +44(0)2920 874066

<sup>b</sup> Cardiff School of Biosciences, Main Building, Museum Avenue, Cardiff,  
Wales UK CF10 3TL e-mail : lloyd@cf.ac.uk

<sup>c</sup> Confocal Microscopy Unit, Cardiff School of Biosciences, Life Sciences  
Building, Cardiff, Wales UK CF10 3US

## Supplementary Information

### Data fits for lifetime decay measurements

1) Ru-nanoparticles in air ( $\tau = 1.81$  ns; mono exponential with  $\chi^2(\text{fit}) = 1.02$ )

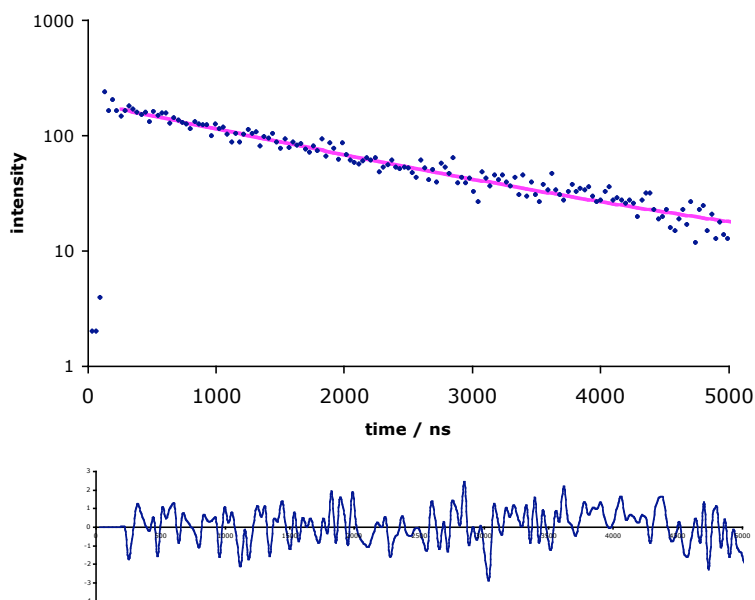

2) Ru-nanoparticles in dinitrogen ( $\tau = 3.88 \text{ ns}$ , mono exponential with  $\chi^2(\text{fit}) = 1.01$ )

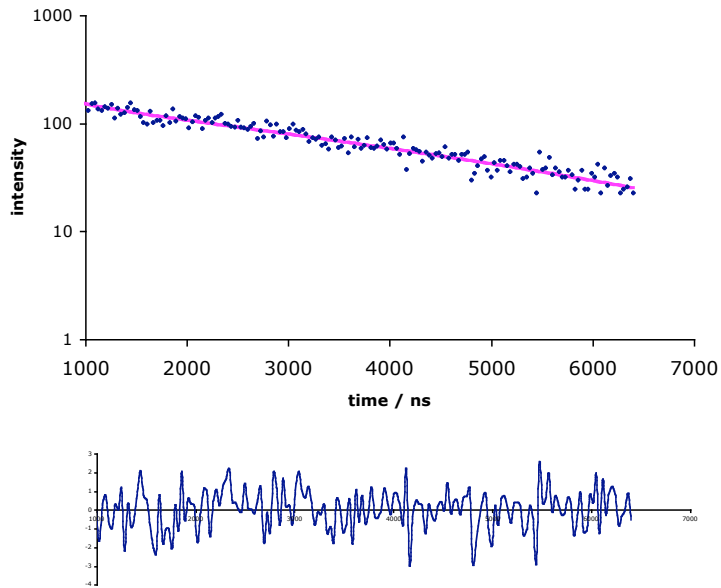

3) Electroporated cells in air ( $\tau = 2.92 \text{ ns}$ ; mono exponential with  $\chi^2(\text{fit}) = 0.99$ )

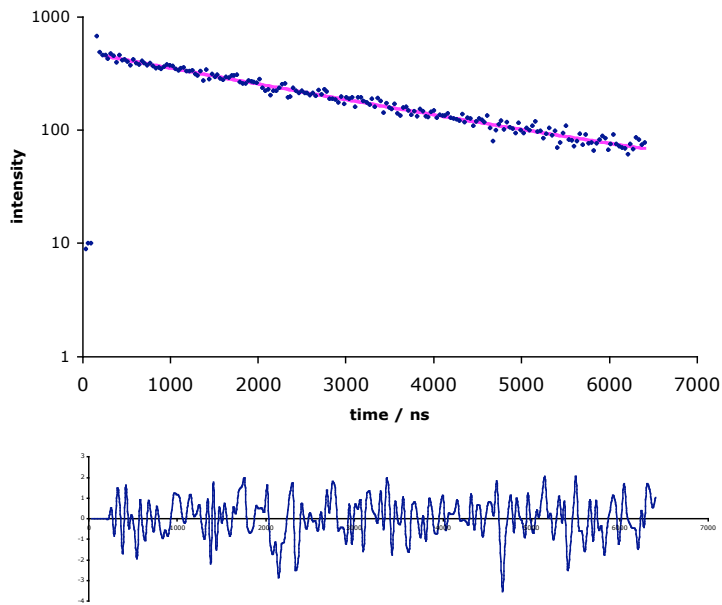

4) Electroperated cells in dinitrogen ( $\tau = 4.06$  ns; mono exponential with  $\chi^2(\text{fit}) = 1.06$ )

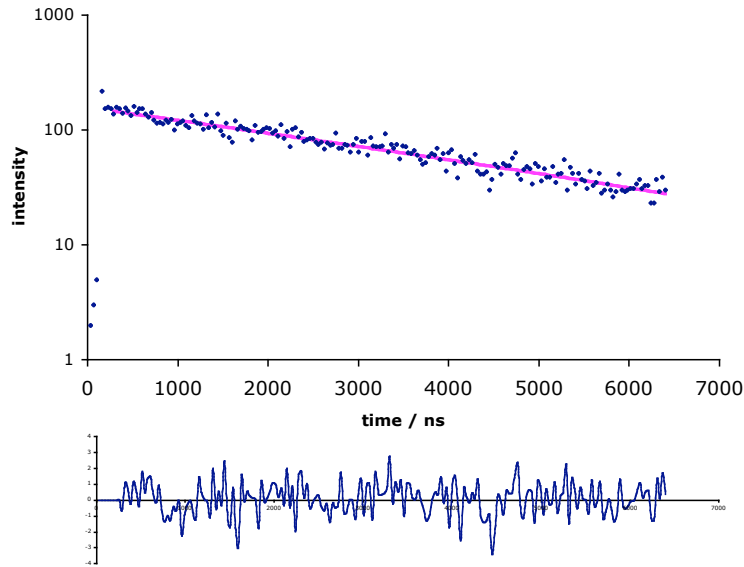

Supplement: b9pp00071b.pdf [file b9pp00071b.pdf]
